# Supplementary material for: Lattice-trapping synthesis enhances fixation of As( v ) in As@zeolite P
Source: Royal Society of Chemistry journal article supplement (doi:10.1039/d4ta08473j), 2025-01-01
Supplement: d4ta08473j1.pdf [file d4ta08473j1.pdf]

1

## Supplementary Information

2 **Lattice-Trapped Synthesis Enhances Fixation of As(V) in As@zeolite P**

3 Lu Ma<sup>1</sup>, Yu Li<sup>1</sup>, Qi Wang<sup>1</sup>, Ning Fen<sup>1</sup>, Ruyang Wang<sup>1</sup>, Mei Yang<sup>1</sup>, Qian Ma<sup>1</sup> Yuanyuan

4 Li<sup>1</sup>, Yulong Ma<sup>1</sup>, Yonggang Sun<sup>1</sup>, Wenxin Ji<sup>1\*</sup>

5 <sup>1</sup>State Key Laboratory of High-efficiency Utilization of Coal and Green Chemical

6 Engineering, College of Chemistry and Chemical Engineering, Ningxia University,

7 Yinchuan, China

8 \*Corresponding author email: [jwx@nxu.edu.cn](mailto:jwx@nxu.edu.cn)

9

10 **Text S1:** Materials and methods

11 **Text S2:** DFT calculation details

12 **Text S3:** The study on the impact of contact time on removal kinetics and the removal  
13 isotherm

14 **List of Figures and Tables**

15 **Fig. S1** shows the PXRD patterns of the CGCS.

16 **Fig. S2** Model of zeolite P with immobilized As(V) for DFT calculations (a. Top view.  
17 b. Side view). Oxygen is shown in red, silicon in yellow, and aluminum in purple.

18 **Fig. S3** Transmission electron microscopy (TEM) images of As@zeolite P.

19 **Fig. S4** displays the structural information of the zeolite P (312) surface for DFT  
20 calculations. Oxygen is represented in red, silicon in yellow, and aluminum in purple.

21 **Fig. S5** A illustrates the variation in the removal amount of  $\text{AsO}_4^{3-}_{\text{aq}}$  on zeolite P at  
22 different contact times. B presents the relationship between the  $t/q_t$  of  $\text{AsO}_4^{3-}_{\text{aq}}$  and  
23 time  $t$ . C: The plot of  $\ln(q_e - q_t)$  of  $\text{AsO}_4^{3-}_{\text{aq}}$  versus time  $t$ . D: The removal isotherm  
24 for  $\text{AsO}_4^{3-}_{\text{aq}}$  by zeolite P. E: The leaching fixation rate of  $\text{As(V)}_{\text{aq}}$  after removal by  
25 zeolite P under different pH conditions.

26 **Fig. S6** The bond length data for the As-O tetrahedron and Si-O tetrahedron after  
27 optimization by DFT calculations are presented.

28 **Table S1** XRF results of CGCS.

29 **Table S2** Kinetic parameters for the removal of  $\text{AsO}_4^{3-}_{\text{aq}}$  on zeolite P.

30 **Table S3** Isotherm parameters for the removal of  $\text{AsO}_4^{3-}_{\text{aq}}$  by zeolite P.

31 **Table S4** Adsorption energies of  $\text{AsO}_4^{3-}$  ions on the zeolite P (312) surface. (ads, unit:  
32  $\text{kJ mol}^{-1}$ )

33

34 **Text S1: Materials and methods**

35 **1. Preparation of zeolite P**

36 Firstly, 2 g of CGCS and 3 g of  $\text{Na}_2\text{SiO}_3 \cdot 9\text{H}_2\text{O}$  were mixed uniformly and then  
37 ground in a mortar for 10 min. Subsequently, the mixture was transferred to a 50 mL  
38 hydrothermal reactor. The reaction was kept in a constant temperature oven at 80 °C  
39 for 48 h. After the reaction was completed, the product was thoroughly washed and  
40 then dried at 105 °C for 6 h. The dried samples are stored in a dryer for further  
41 characterization.

42 **2. Removal of  $\text{As(V)}_{\text{aq}}$  by Zeolite P**

43 This study aims to investigate the removal behavior of Zeolite P towards  $\text{As(V)}_{\text{aq}}$ .  
44 Synthesized Zeolite P is added to arsenate solutions with concentrations ranging from  
45 50 to 500  $\text{mg L}^{-1}$ . Place the vials in a constant temperature oscillator at 150 rpm and  
46 25 °C. Pre-set sampling times are set at 30, 60, 360, 720, and 1440 min for kinetic  
47 experiments. Instantaneous arsenate concentrations are analyzed using a triple  
48 quadrupole inductively coupled plasma mass spectrometer (iCAP TQ ICP-MS, Thermo  
49 Scientific).

50

51 **Text S2: DFT calculation details**

52 In the computational study of the binding energy between  $\text{AsO}_4^{3-}$  anions and the pre-  
53 synthesized framework of  $\text{As@zeolite P}$ , the lattice parameters of zeolite P were initially  
54 set as  $a = 9.99 \text{ \AA}$ ,  $b = 9.99 \text{ \AA}$ ,  $c = 10.06 \text{ \AA}$ , and  $\alpha = \beta = \gamma = 90^\circ$ . To accommodate the  
55 analysis, a  $2 \times 1 \times 1$  supercell was constructed, resulting in an expanded unit cell with  
56 parameters  $a = 19.99 \text{ \AA}$ ,  $b = 9.99 \text{ \AA}$ ,  $c = 10.06 \text{ \AA}$ , and  $\alpha = \beta = \gamma = 90^\circ$ .

57 The Density Functional Theory (DFT) calculations for the interaction between  $\text{AsO}_4^{3-}$   
58 and the zeolite P surface were performed using the DMol3 module within Materials  
59 Studio 2019. The calculations employed the DNP basis set and the GGA PBE exchange-  
60 correlation functional<sup>1-6</sup>. To ensure high computational precision, the convergence  
61 criteria were set to an energy threshold of  $1.0 \times 10^{-5} \text{ eV}$ , a maximum force of  $0.05 \text{ eV \AA}^{-1}$ ,  
62 and a maximum displacement of  $0.005 \text{ \AA}$ . The integration over the Brillouin zone of  
63 all surfaces was carried out using a  $2 \times 6 \times 2$  Monkhorst-Pack grid. For the zeolite P (3 1  
64 2) surface, the principal parameters were refined to  $a = 28.38 \text{ \AA}$ ,  $b = 9.99 \text{ \AA}$ ,  $c = 37.27$   
65  $\text{ \AA}$ , and  $\alpha = \beta = \gamma = 90^\circ$ .

66 To be more specific, first, build a box with 1  $\text{AsO}_4^{3-}$  and zeolite P. In order to avoid  
67 the influence of other atoms, a vacuum layer with a thickness of  $30 \text{ \AA}$  was added to the  
68 surface of zeolite P crystal. The zeolite P (312) surface is used in the calculation. All  
69 equilibrium structures are obtained without symmetry constraints. Additional details of  
70 the calculation are presented in text S1 in the support information. The adsorption  
71 energy ( $E_{\text{adsorption}}$ ) of  $\text{AsO}_4^{3-}$  onto the zeolite P (312) surface is calculated using  
72 Equation (4):

$$E_{ads} = E_{total} - E_{surface} - E_{arsenate\ anion} \quad (1)$$

73 here  $E_{total}$  is the total energy of zeolite P (312) crystal surface and  $AsO_4^{3-}$ ,  $E_{surface}$  is  
74 the total energy of zeolite P (312) crystal surface,  $E_{arsenate\ anion}$  is the total energy of  
75  $AsO_4^{3-}$ . Negative adsorption energy indicates that adsorption is exothermic; The more  
76 negative the adsorption energy is, the greater the absorption amount of adsorbent is. Fig.  
77 S4 and Table S2 show the structural information and adsorption energy of the zeolite P  
78 (312) surface for DFT calculations.

79

80 **Text S3: The study on the impact of contact time on removal kinetics and the**  
81 **removal isotherm**

82 To investigate the removal performance of zeolite P for  $\text{AsO}_4^{3-}_{\text{aq}}$ , a series of batch  
83 experiments were conducted. As shown in Fig. S5A, the contact time had a significant  
84 impact on the removal efficiency of  $\text{AsO}_4^{3-}_{\text{aq}}$  by zeolite P. At the initial stage of the  
85 experiment, the removal rate increased rapidly and then entered a slow removal phase.  
86 As the contact time extended, the removal amount continued to increase until it reached  
87 an equilibrium state after approximately 30 min. The initial rapid removal phase could  
88 be attributed to the high availability of binding sites on the surface of zeolite P. Over  
89 time, these binding sites were gradually occupied and approached saturation, leading to  
90 a decrease in the removal rate in the later stage. This phenomenon is consistent with the  
91 reports of previous researchers, indicating that the removal process has similar dynamic  
92 characteristics.

93 This study further analyzed the variation of removal data over time using pseudo-first-  
94 order and pseudo-second-order kinetic models to provide deeper insights into the  
95 removal mechanism. The results show that within 30 min, the removal of  $\text{AsO}_4^{3-}_{\text{aq}}$  by  
96 zeolite P had reached equilibrium, with the removal amount reaching a maximum,  
97 which provides an important basis for evaluating the equilibrium or maximum removal  
98 capacity. The models can be expressed as<sup>7-9</sup>:

99 Pseudo-first-order

$$\ln(q_e - q_t) = \ln q_e - K_1 t \quad (1)$$

100

101 Pseudo-second-order

$$\frac{t}{q_t} = \frac{1}{K_2 q_e^2} + \frac{1}{q_e} t \quad (2)$$

102 where  $q_e$  ( $\text{mg g}^{-1}$ ) and  $q_t$  ( $\text{mg g}^{-1}$ ) respectively represent the amount of metal ions  
103 removed at equilibrium and at a specific time point. The rate constants  $K_1$  ( $\text{min}^{-1}$ ) and  
104  $K_2$  ( $\text{g mg}^{-1} \text{min}^{-1}$ ) correspond to the kinetic parameters of the first-order and second-  
105 order removal models, respectively.

106 Table S2 presents the kinetic parameters calculated based on the two models. The  
107 parameter values for the pseudo-second-order model are higher than those for the  
108 pseudo-first-order model, indicating that the pseudo-second-order model has a higher  
109 fitting goodness in describing the removal kinetics of  $\text{AsO}_4^{3-}$  on zeolite P. Moreover,  
110 the relationship between the amount of  $\text{AsO}_4^{3-}$  removed and time ( $t/q_t$  vs.  $t$  curve)  
111 and the relationship between  $\ln(q_e - q_t)$  and time  $t$  are shown in Fig. S5B and S5C,  
112 respectively. The results show that the  $t/q_t$  vs.  $t$  curve further supports the validity of  
113 the pseudo-second-order model. Based on the assumption of the pseudo-second-order  
114 model, this study infers that the removal process of  $\text{AsO}_4^{3-}$  on zeolite P is primarily  
115 controlled by physical adsorption mechanisms and is closely related to diffusion  
116 processes. This inference is not only supported by the kinetic data but also aligns with  
117 the existing literature's understanding of similar removal systems.

118 The removal isotherm for  $\text{AsO}_4^{3-}$  removal by zeolite P is shown in Fig. S5D. The  
119 simulation of removal isotherms is generally performed using the Langmuir and  
120 Freundlich models, which can be expressed as<sup>10</sup>:

$$\frac{C_e}{q_e} = \frac{1}{q_{max} K_L} + \frac{C_e}{q_{max}} \quad (3)$$

$$\log q_e = \frac{1}{n} \log C_e + \log K_F \quad (4)$$

121 where  $C_e$  ( $\text{mg L}^{-1}$ ) is the equilibrium concentration of the metal ions in the solution,  
122  $q_e$  ( $\text{mg g}^{-1}$ ) and  $q_{max}$  ( $\text{mg g}^{-1}$ ) are the equilibrium removal amount and the maximum  
123 removal capacity, respectively,  $K_L$  ( $\text{L mg}^{-1}$ ) is the constant of the Langmuir isotherm,  
124 and  $K_F$  and  $n$  are the constants of the Freundlich isotherm.

125 Table S3 details the related parameters of the Langmuir and Freundlich isotherm  
126 models. The data from Table S3 show that after comparing the coefficient of  
127 determination ( $R^2$ ) of the two models, the Langmuir model provides a higher fitting  
128 degree for the removal behavior of  $\text{AsO}_4^{3-}_{\text{aq}}$ . According to the Langmuir isotherm model,  
129 the maximum removal capacity for  $\text{AsO}_4^{3-}_{\text{aq}}$  is  $14.08 \text{ mg g}^{-1}$ . Additionally, the results  
130 shown in Fig. S5E indicate that under strongly alkaline conditions at a pH of 12, the  
131 fixation rate of  $\text{AsO}_4^{3-}_{\text{aq}}$  is relatively low (86.68%), suggesting the leaching of  $\text{AsO}_4^{3-}_{\text{aq}}$   
132 from zeolite P in highly alkaline environments.

133



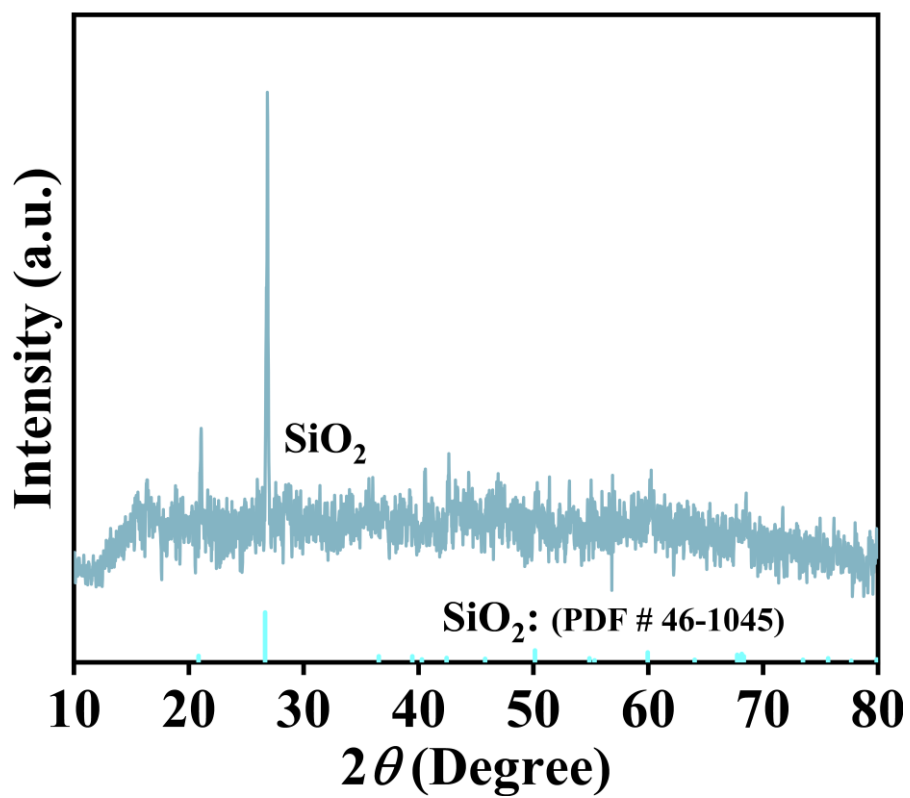

134

135 **Fig. S1** Shows the PXRD patterns of the CGCS.

136

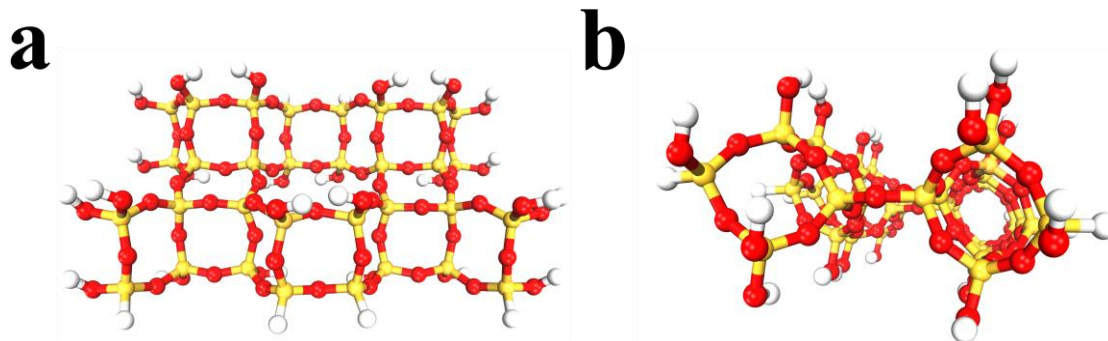

137

138 **Fig. S2** Model of zeolite P with immobilized As(V) for DFT calculations (a. Top view.

139 b. Side view). Oxygen is shown in red, silicon in yellow, and aluminum in purple.

140

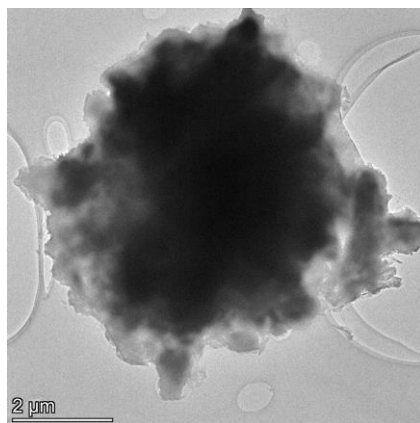

141

142 **Fig. S3** Transmission electron microscopy (TEM) images of As@zeolite P.

143

144

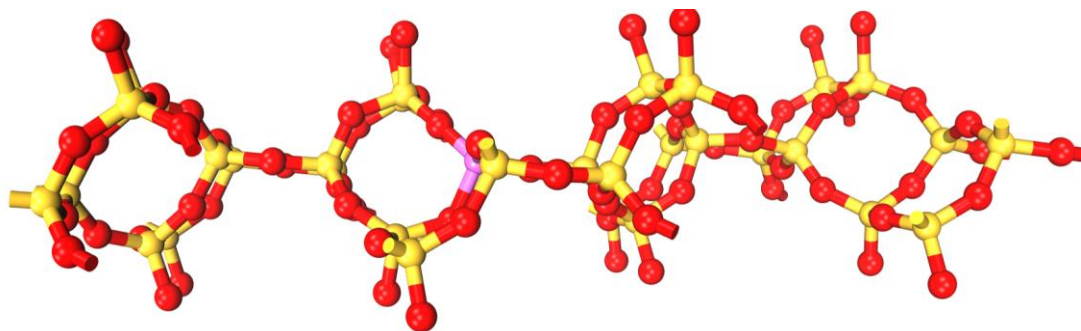

145

146 **Fig. S4** Displays the structural information of the zeolite P (312) surface for DFT  
147 calculations. Oxygen is represented in red, silicon in yellow, and aluminum in purple.

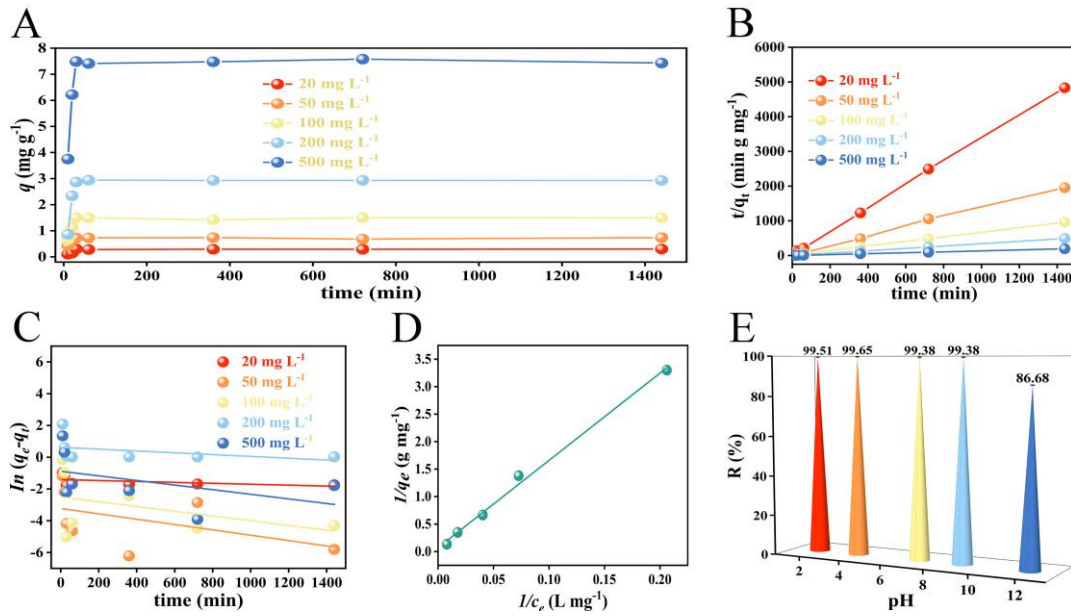

148

149 **Fig. S5** A illustrates the variation in the removal amount of AsO<sub>4</sub><sup>3-</sup><sub>aq</sub> on zeolite P at  
 150 different contact times. B presents the relationship between the  $t/q_t$  of AsO<sub>4</sub><sup>3-</sup><sub>aq</sub> and  
 151 time  $t$ . C: The plot of  $\ln(q_e - q_t)$  of AsO<sub>4</sub><sup>3-</sup><sub>aq</sub> versus time  $t$ . D: The removal isotherm  
 152 for AsO<sub>4</sub><sup>3-</sup><sub>aq</sub> by zeolite P. E: The leaching fixation rate of As(V)<sub>aq</sub> after removal by  
 153 zeolite P under different pH conditions.

154

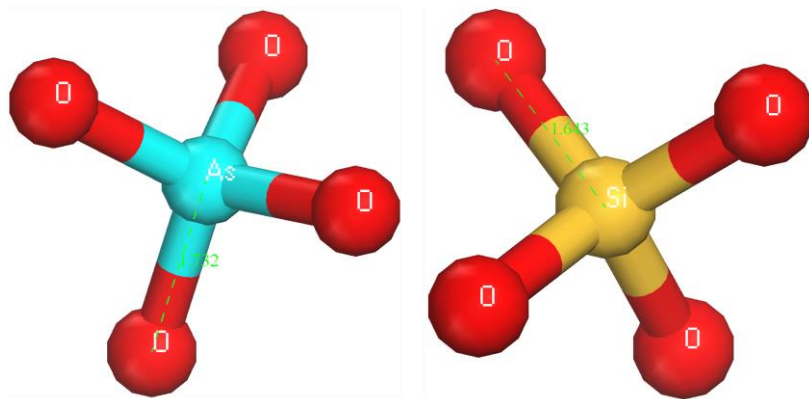

**As-O 1.73 Å**

**Si-O 1.64 Å**

155

156 **Fig. S6** The bond length data for the As-O tetrahedron and Si-O tetrahedron after

157 optimization by DFT calculations are presented.

158

159 **Table S1 XRF results of CGCS**

| <b>Oxides</b> | <b>SiO<sub>2</sub></b> | <b>Al<sub>2</sub>O<sub>3</sub></b> | <b>Na<sub>2</sub>O</b> | <b>Fe<sub>2</sub>O<sub>3</sub></b> | <b>MgO</b> | <b>CaO</b> | <b>K<sub>2</sub>O</b> | <b>TiO<sub>2</sub></b> |
|---------------|------------------------|------------------------------------|------------------------|------------------------------------|------------|------------|-----------------------|------------------------|
| <b>Wt.%</b>   | 53.11                  | 19.72                              | 1.80                   | 8.61                               | 2.46       | 8.97       | 2.42                  | 1.05                   |

160

161 **Table S2 Kinetic parameters for the removal of AsO<sub>4</sub><sup>3-</sup>aq on zeolite P**

| <b><i>C</i><sub>0</sub> (mg L<sup>-1</sup>)</b> | <b>Pseudo-first-order</b>                                     |                                                  |                       | <b>Pseudo-second-order</b>                       |                                                               |                       |                                                  |
|-------------------------------------------------|---------------------------------------------------------------|--------------------------------------------------|-----------------------|--------------------------------------------------|---------------------------------------------------------------|-----------------------|--------------------------------------------------|
|                                                 | <i>k</i> <sub>1</sub> × 10 <sup>-4</sup> (min <sup>-1</sup> ) | <i>q</i> <sub>e, cal</sub> (mg g <sup>-1</sup> ) | <i>R</i> <sup>2</sup> | <i>q</i> <sub>e, exp</sub> (mg g <sup>-1</sup> ) | <i>k</i> <sub>2</sub> (mg g <sup>-1</sup> min <sup>-1</sup> ) | <i>R</i> <sup>2</sup> | <i>q</i> <sub>e, cal</sub> (mg g <sup>-1</sup> ) |
| <b>20</b>                                       | 2.91                                                          | 0.245                                            | 0.228                 | 0.30                                             | 0.27                                                          | 0.999                 | 0.30                                             |
| <b>50</b>                                       | 16.80                                                         | 0.400                                            | 0.233                 | 0.72                                             | 0.22                                                          | 0.999                 | 0.73                                             |
| <b>100</b>                                      | 14.90                                                         | 0.083                                            | 0.178                 | 1.50                                             | 0.10                                                          | 0.999                 | 1.49                                             |
| <b>200</b>                                      | 5.70                                                          | 1.856                                            | 0.157                 | 2.87                                             | 0.05                                                          | 0.999                 | 2.94                                             |
| <b>500</b>                                      | 14.50                                                         | 0.416                                            | 0.200                 | 7.49                                             | 0.07                                                          | 0.999                 | 7.69                                             |

162



163 **Table S3 Isotherm parameters for the removal of  $\text{AsO}_4^{3-}\text{-aq}$  by zeolite P**

| <b>Isotherms</b>  | <b>Parameters</b>                | <b><math>\text{AsO}_4^{3-}\text{-aq}</math></b> |
|-------------------|----------------------------------|-------------------------------------------------|
| <b>Langmuir</b>   | $q_{max}$ ( $\text{mg g}^{-1}$ ) | 14.08                                           |
|                   | $K_L$ ( $\text{L mg}^{-1}$ )     | 0.004                                           |
|                   | $R^2$                            | 0.995                                           |
| <b>Freundlich</b> | $K_F$                            | 0.061                                           |
|                   | $1/n$                            | 0.980                                           |
|                   | $R^2$                            | 0.994                                           |

164

165 **Table S4 Adsorption energies of AsO<sub>4</sub><sup>3-</sup>aq ions on the zeolite P (312) surface.**  
166 **(ads, unit: kJ mol<sup>-1</sup>)**

| <i>E<sub>total</sub></i> | <i>E<sub>surface</sub></i> | <i>E<sub>arsenate anion</sub></i> | <i>E<sub>ads</sub></i> |
|--------------------------|----------------------------|-----------------------------------|------------------------|
| -17177.12                | -14639.90                  | -2537.20                          | -10.37                 |

167

168 **References**

- 169 1. G. Kresse and J. Hafner, *J Phys-Condens Mat*, 1994, **6**, 8245.  
170 2. G. Kresse and J. Furthmüller, *Phys Rev B*, 1996, **54**, 11169-11186.  
171 3. G. Kresse and J. Furthmüller, *Comp Mater Sci* , 1996, **6**, 15-50.  
172 4. G. Kresse and J. Hafner, *Phys Rev B*, 1993, **47**, 558-561.  
173 5. G. Kresse and D. Joubert, *Phys Rev B*, 1999, **59**, 1758-1775.  
174 6. J. Gao, Y. Zheng, J.-M. Jehng, Y. Tang, I. E. Wachs and S. G. Podkolzin, *Science*, 2015, **348**,  
175 686-690.  
176 7. Y. Niu, W. Hu, M. Guo, Y. Wang, J. Jia and Z. Hu, *Carbohydr Polym*, 2019, **225**, 115218.  
177 8. Y. Yang, Y. Wang, C. Xue, Y. Lin, J.-F. Lee, X. Yi and Z. Dang, *J Clean Prod*, 2024, **452**, 141936.  
178 9. L. Chi, C. Huang, Z. Li, S. Ruan, B. Peng, M. Li, Q. Liang, K. Yin and S. Lu, *Cem Concr*  
179 *Compos*, 2024, **152**, 105667.  
180 10. G. Z. Kyzas, G. Bomis, R. I. Kosheleva, E. K. Efthimiadou, E. P. Favvas, M. Kostoglou and A.  
181 C. Mitropoulos, *Chem Eng J*, 2019, **356**, 91-97.  
182
